RESEARCH ARTICLE

# Establishment of a combination scoring method for diagnosis of ocular adnexal lymphoproliferative disease

Xiao-Li Qu<sup>1</sup>, Yan Hei<sup>2</sup>, Li Kang<sup>2</sup>, Xin-Ji Yang<sup>2</sup>, Yi Wang<sup>2</sup>, Xiao-Zhong Lu<sup>2</sup>, Li-Hua Xiao<sup>2\*</sup>, Guang Yang<sup>3\*</sup>

**1** Ophthalmology Department, Qianfoshan Hospital, Shandong Province, China, **2** Institute of Orbital Disease, General Hospital of Chinese People's Armed Police Forces, Beijing, China, **3** Beijing Institute of Basic Medical Sciences, Beijing, China

\* [xiaolihuawj@sina.com](mailto:xiaolihuawj@sina.com) (LX); [yanggg@hotmail.com](mailto:yanggg@hotmail.com) (GY)

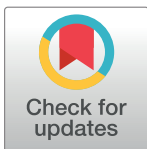

**OPEN ACCESS**

**Citation:** Qu X-L, Hei Y, Kang L, Yang X-J, Wang Y, Lu X-Z, et al. (2017) Establishment of a combination scoring method for diagnosis of ocular adnexal lymphoproliferative disease. PLoS ONE 12(5): e0160175. <https://doi.org/10.1371/journal.pone.0160175>

**Editor:** Menno C. van Zelm, Monash University, AUSTRALIA

**Received:** November 2, 2015

**Accepted:** July 14, 2016

**Published:** May 16, 2017

**Copyright:** © 2017 Qu et al. This is an open access article distributed under the terms of the [Creative Commons Attribution License](https://creativecommons.org/licenses/by/4.0/), which permits unrestricted use, distribution, and reproduction in any medium, provided the original author and source are credited.

**Data Availability Statement:** All relevant data are provided in the Supporting information files.

**Funding:** The study was supported by the General Hospital of Chinese People's Armed Police Forces (WZ2011001). The funder had no role in study design, data collection and analysis, decision to publish, or preparation of the manuscript.

**Competing interests:** The authors have declared that no competing interests exist.

## Abstract

Lymphoproliferative diseases (LPDs) of the ocular adnexa encompass the majority of orbital diseases and include reactive follicular hyperplasia (RFH), atypical lymphoid hyperplasia (ALH), and mucosa-associated lymphoid tissue lymphoma (MALToma). Lymphoid follicles (LFs) are usually observed during the histological examination of LPDs. Currently, because there is a lack of specific clinical signs and diagnostic immunohistochemical biomarkers, it is difficult for pathologists to distinguish MALToma from ocular RFH and ALH, which makes the clinical management of these conditions difficult. Here, we analyzed the clinical features of patients with ocular adnexal LPDs ( $n = 125$ ) and investigated the structure of LFs in paraffin-embedded tissue samples using anti-CD23 and anti-IgD immunohistochemistry. We found that some clinical features including age, sex, and laterality were different among RFH, LFH, and MALToma. Additionally, immunohistochemistry revealed that the expression of IgD and CD23 was higher in RFH patients and decreased in patients with ALH and MALToma. Moreover, LFs in RFH were intact, whereas the structures of most LFs were disrupted in ALH. In MALToma specimens, few intact LFs were observed. In a further investigation, we combined the results for CD23/IgD immunohistochemistry and the structure of LFs to establish a scoring method for the differential diagnosis of LPDs. According to the BIOMED-2 protocol, we further detected IgH gene monoclonal rearrangement in 73 cases (35 RFH, 17 ALH, and 21 MALToma cases). The sensitivity of our scoring method, based on a comparison with the results of IgH gene monoclonal rearrangement detection, was 85.7% (18/21) for MALToma and 35.3% (6/17) for ALH. Our study provides a method that may be useful for the differential diagnosis of RFH, ALH, and MALToma.

## Introduction

Lymphoproliferative disease (LPD) of the ocular adnexa is a relatively common orbital disease and is reported to account for 10.0–24.7% of primary ocular adnexal tumors [1,2]. Ocular

adnexal LPDs can arise within the intraconal and extraconal orbit soft tissues, lacrimal gland, extraocular muscles, lacrimal sac, eyelids, or conjunctiva. Ocular adnexal LPD is a heterogeneous group that is mainly divided into three subtypes: reactive follicular hyperplasia (RFH), atypical lymphoid hyperplasia (ALH), and extranodal marginal zone lymphoma of mucosa associated lymphoid tissue lymphoma (MALToma). Most of these primary tumors are B-cell-derived.

MALToma has been recognized as the most common histologic type of ocular adnexal lymphomas and is reported to comprise approximately 35–90% of primary ocular adnexal lymphomas [2–5]. Classical MALToma is a low-grade, extranodal, marginal zone non-Hodgkin's B-cell lymphoma. RFH is considered to be a benign and reversible hyperproliferative condition that presents as a mass-like lesion characterized by many LFs with infiltration of mature plasma cells and histiocytes [6]. In contrast, ALH is an equivocal lymphoproliferative lesion that cannot be diagnosed as definitely benign or malignant and is characterized by serious clinicopathologic features that are still insufficient to justify a malignant diagnosis [7,8]. It has been suggested that ocular adnexal LPDs might arise from chronic inflammatory or autoimmune disorders [3,9–14].

It is nearly impossible to categorize all ocular LPDs into clearly defined types, since the histological features might vary extensively among different cases. For instance, lesions often share certain overlapping morphological features, particularly when the tissue becomes infiltrated with clusters of small B-cells with scattered centrocyte/centroblast-like, plasmacytoid, and monocytoid cells or LFs. Thus, the histopathological diagnosis of RFH, ALH, and MALToma in the ocular adnexa is relatively difficult for clinicians and pathologists, which makes choosing a therapeutic method difficult. Currently, molecular genetic analysis and immunophenotyping techniques are commonly applied to assist pathologists in obtaining an accurate diagnosis [1,15,16], but the feasibility and consistency of these procedures are still not adequate in most hospitals.

The secondary LFs in peripheral lymphoid organs are key sites for somatic hypermutation and immunoglobulin (Ig) class switching to generate mature B-cell populations for the humoral immune response [17–20]. LF formation depends on the activation of naïve B-cells by T-cells capable of recognizing epitopes of the same antigenic complex [19,21]. In peripheral lymphoid tissues, transmembrane immunoglobulin D (IgD) is strictly expressed by naïve mature B-cells that form a mantle zone (MZ) as an approximately smooth curved contour of the LF, whereas CD23<sup>+</sup> follicular dendritic cells (FDCs) exist in the germinal center (GC) as a high-density meshwork encompassed by the MZ [22, 23]. Thus, a typical secondary LF is marked by an IgD<sup>+</sup> MZ and an IgD<sup>-</sup>CD23<sup>+</sup> GC. LFs can be observed in all three subtypes of LPDs within the ocular adnexa; however, their presence varies among diseases. Therefore, we sought to determine whether the differential diagnosis of ocular adnexal RFH, ALH, and MALToma could be performed based on CD23/IgD immunostaining and clinicopathological manifestations. We also analyzed the associations of CD23 and IgD among the three LPD subtypes in a Chinese population.

## Materials and methods

### Study subjects

We performed a retrospective study of 125 patients with primary ocular adnexal LPD who were diagnosed at the Institute of Orbital Disease, General Hospital of Chinese People's Armed Police Forces (Beijing, China) from January 2006 to September 2014. The study population was divided into three subgroups based on diagnosis: RFH ( $n = 54$ ), ALH ( $n = 28$ ), and MALToma ( $n = 43$ ). Every case was reviewed by two experienced pathologists to reach a

consistent diagnosis according to the criteria of the 2008 World Health Organization (WHO) Classification of Tumor of Hematopoietic and Lymphoid Tissues [23]. Patients with inadequate clinical information or insufficient paraffin-embedded tumor specimens were excluded from this study. Demographic profiles (age, sex), clinical information (primary presentation, signs, symptoms, medical treatment history, and evidence of systemic disease) and histological diagnostic records (sample site and immunohistochemical manifestation) were extracted from surgical pathology reports. Computed tomography and/or magnetic resonance imaging scans, if available, were reviewed to localize the site and extent of disease. Clinical staging was performed for all MALToma patients according to the Ann Arbor classification. All primary MALToma patients were in stage IE. After surgical resection under general anesthesia, MALToma patients were sent to an oncologist for further treatment. All patients were sero-negative for human immunodeficiency virus and none of them had severe systemic diseases or other malignant tumors. The research protocol was reviewed and approved by the ethics committees and institutional review board of the General Hospital of Chinese People's Armed Police Forces, and the study was conducted according to the principles of the Declaration of Helsinki. Written informed consent for the collection of medical information and specimens was obtained from patients or their guardians at the first visit.

## Histopathology and immunohistochemistry

Tumor specimens were fixed in 10% (v/v) neutral buffered formalin and embedded in paraffin. The fixation time depended on the size of the tissue block and the tissue type. Serial sections (2  $\mu$ m) were cut using a microtome and affixed onto positively charged slides. All slides were incubated at 60°C for a few hours to allow the sections to adhere to the slides. Then, tissues were deparaffinized and rehydrated through graded xylene and alcohol. Hematoxylin-eosin and immunohistochemical (IHC) staining procedures were performed according to routine protocols. Heat-induced epitope retrieval was performed using a pressure cooker in ethylenediaminetetraacetic acid buffer at pH 9.0. Primary antibody incubations were performed according to the manufacturer's instructions. Antibodies were purchased from the following sources: anti-CD3 (ZA-0503), anti-CD20 (ZA-0549), anti-CD21 (ZA-0525), anti-CD23 (ZA-0516), and anti-Ki-67 (ZA-0502) were from ZSGB-BIO (Beijing, China) and anti-IgD (ab124795) was from Abcam (Cambridge, UK). All images were acquired on a DM2500 microscope (Leica, Wetzlar, Germany).

Analysis of IgD and CD23 immunostaining was performed by two independent histopathologists. Tonsil specimens from adenoid hypertrophy patients and samples processed without primary antibody were used as positive and negative controls, respectively. To control for inter-observer variation, IHC was scored twice at different institutions in a blinded manner. Five different high-power fields (HPF,  $\times 400$ ) for each section were counted, and the average number of positive cells per HPF was calculated. The variation between the two scorers was < 5%.

According to previous studies on the FDC meshwork and MZ in small B-cell lymphomas [24–26], we classified the characteristics of LF and CD23/IgD staining into four categories for each parameter and scored them as described in Tables 1 and 2.

## Molecular analysis of IgH gene rearrangements

Genomic DNA was extracted from formalin fixed paraffin embedded tissue using a QIAGEN DNA extraction kit. Extracted DNA was kept at  $-20^{\circ}\text{C}$ . PCR amplifications of IgH rearrangements were performed using consensus primers (FR1, FR2, and FR3) based on the strategy of BIOMED-2 [20]. The PCR reaction mixture and the cycling conditions also followed the

**Table 1. Immunostaining scoring criteria for CD23/IgD expression level.**

| Expression score | CD23/IgD expression level (%) |
|------------------|-------------------------------|
| 0                | 0                             |
| 1                | 1–10                          |
| 2                | 11–20                         |
| 3                | ≥ 21                          |

<https://doi.org/10.1371/journal.pone.0160175.t001>

BIOMED-2 protocol. PCR products were analyzed by electrophoresis in a 2% (w/v) agarose gel containing GoldView™. We performed denaturation and renaturation of PCR products to distinguish between clonal and diverse products following the methods of Langerak et al [27]. Each PCR reaction was performed with a negative control (without genomic DNA) and a positive control (testified IgH rearrangement sample). Clonal rearrangements were assigned as one or two identical band(s) in the appropriate size range. Polyclonal patterns were characterized by the presence of a smear or multiple bands in the gels.

### Statistical analysis

The data were statistically analyzed using SPSS for Windows (Version 17.0, SPSS Inc., Chicago, IL, USA). Results were expressed as the means ± standard deviation. Differences in surface biomarker expression among groups were analyzed using unpaired Student’s *t* tests. Differences in clinical characteristics among subgroups were determined by  $\chi^2$ , two-tailed Fisher’s exact, least significant difference analysis of variance, or Student’s *t* tests, as appropriate. Differences of  $P < 0.05$  or  $P < 0.05/n$  (correct level for multiple comparisons,  $n$  = number of multiple comparisons) were considered statistically significant.

## Results

### Clinical characteristics of the patient population

The clinical characteristics of the patient population are summarized in Table 3. Notably, several trends towards differences in the clinical characteristics could be distinguished among the three disease types. There was a large variation in patient age (13–93 years), with mean ages of 55.92, 60.44, and 64.95 years (ranges: 13–82, 23–77, and 35–93 years) in the RFH, ALH, and MALToma groups, respectively. Patient age also tended to increase with LPD progression. The age of patients with RFH was significantly lower than that of patients in the MALToma group ( $P < 0.001$ ). Moreover, 28/54 RFH patients (51.85%) were female, whereas 9/43 MALToma patients (20.93%) were female ( $P = 0.002$ ). The time from symptom onset to final diagnosis varied from 0.5 to 360 months in all patients. The mean disease duration for RFH was 50.38 months, which seemed longer than that for ALH and MALToma, although the difference was not statistically significant ( $P_{RFH \& ALH} = 0.027$ ,  $P_{RFH \& MALT} = 0.025$ ).

In our analysis, the majority of LPDs occurred in the orbit soft tissue, conjunctiva, lachrymal gland, and extraocular muscle. Some cases involved the eyelid, nasolacrimal duct, and

**Table 2. Immunostaining scoring criteria for lymphoid follicle structure.**

| LF score | Lymphoid follicle structure                                                 |
|----------|-----------------------------------------------------------------------------|
| 0        | No staining or few scattered positively stained cells                       |
| 1        | Some scattered disrupted fragments with no intact lymphoid follicles        |
| 2        | Some intact lymphoid follicles and scattered FDC/MZ fragments               |
| 3        | Most lymphoid follicles are intact, accompanied by some disrupted fragments |

<https://doi.org/10.1371/journal.pone.0160175.t002>

**Table 3. Clinical features of 125 patients with ocular adnexal LPDs.**

| Clinical parameters                      | RFH (%) (n = 54) | ALH (%) (n = 28) | MALToma (%) (n = 43) | P       | P <sub>RFH&amp;ALH</sub> | P <sub>RFH&amp;MALToma</sub> | P <sub>ALH&amp;MALToma</sub> |
|------------------------------------------|------------------|------------------|----------------------|---------|--------------------------|------------------------------|------------------------------|
| <b>Age (years)</b>                       |                  |                  |                      | 0.002   | 0.199                    | < 0.001                      | 0.065                        |
| Mean ± standard deviation                | 55.92 ± 12.85    | 60.44 ± 12.99    | 64.95 ± 12.16        |         |                          |                              |                              |
| Range                                    | 13–82            | 23–77            | 35–93                |         |                          |                              |                              |
| <b>Sex</b>                               |                  |                  |                      | 0.006   | 0.089                    | 0.002                        | 0.289                        |
| Female                                   | 28 (51.85)       | 9 (32.14)        | 9 (20.93)            |         |                          |                              |                              |
| Male                                     | 26 (48.15)       | 19 (67.86)       | 34 (79.07)           |         |                          |                              |                              |
| <b>Duration until diagnosis (months)</b> | 0.5–360          | 1–120            | 1–240                | 0.028   | 0.027                    | 0.025                        | 0.812                        |
| <b>Anatomical site</b>                   |                  |                  |                      |         |                          |                              |                              |
| Orbital soft tissue                      | 32 (59.26)       | 25 (89.29)       | 41 (95.35)           | < 0.001 | 0.005                    | < 0.001                      | 0.376                        |
| Conjunctiva                              | 0 (0)            | 2 (7.14)         | 8 (18.60)            | 0.004   | 0.114                    | 0.001                        | 0.296                        |
| Lachrymal gland                          | 31 (57.41)       | 8 (28.57)        | 6 (13.95)            | < 0.001 | 0.013                    | < 0.001                      | 0.130                        |
| Extraocular muscle                       | 14 (25.93)       | 11 (39.29)       | 12 (27.91)           | 0.434   | 0.213                    | 0.827                        | 0.317                        |
| Other sites*                             | 5 (9.26)         | 2 (7.14)         | 2 (4.64)             | 0.166   | 0.06                     | 0.326                        | 0.327                        |
| <b>Laterality</b>                        |                  |                  |                      | 0.001   | 0.015                    | 0.001                        | 0.732                        |
| Unilateral                               | 32 (59.26)       | 24 (85.71)       | 38 (88.37)           |         |                          |                              |                              |
| Bilateral                                | 22 (40.74)       | 4 (14.29)        | 5 (11.63)            |         |                          |                              |                              |
| <b>Clinical symptoms</b>                 |                  |                  |                      |         |                          |                              |                              |
| Periorbital swelling                     | 40 (70.07)       | 22 (78.57)       | 35 (81.40)           | 0.685   | 0.653                    | 0.392                        | 0.770                        |
| Proptosis                                | 46 (85.19)       | 22 (78.57)       | 37 (86.05)           | 0.683   | 0.593                    | 0.905                        | 0.521                        |
| Impaired vision                          | 3 (5.56)         | 1 (3.57)         | 8 (18.60)            | 0.051   | 1.00                     | 0.057                        | 0.078                        |
| Epiphora                                 | 2 (3.70)         | 1 (3.57)         | 4 (9.30)             | 0.449   | 1.00                     | 0.401                        | 0.642                        |
| Pain                                     | 1 (1.85)         | 1 (3.57)         | 1 (2.33)             | 0.896   | 1.00                     | 1.00                         | 1.00                         |
| Motility impairment                      | 4 (7.41)         | 0 (0)            | 10 (23.26)           | 0.002   | 0.294                    | 0.041                        | 0.005                        |
| Ptosis                                   | 2 (3.70)         | 1 (3.57)         | 5 (11.63)            | 0.245   | 1.00                     | 0.236                        | 0.392                        |

\* “Other sites” includes the eyelid, nasolacrimal duct, and nerve.

<https://doi.org/10.1371/journal.pone.0160175.t003>

nerves of the orbit. Tumors were found in two or more anatomical compartments in 59/125 (47.2%) patients. The orbit soft tissue was the most frequently involved location among all cases (98/125, 78.4%), and was involved at a particularly high frequency in MALToma patients (41/43, 95.35%), whereas lachrymal gland involvement was more prevalent in RFH patients than in the other two groups (31/44, 57.4%;  $P < 0.0167$ ). In contrast, conjunctiva involvement was rarely present in RFH and was more prevalent in ALH and MALToma ( $P < 0.0167$ ). Furthermore, 22/54 (40.7%) of RFH cases presented with bilateral lesions, whereas unilateral involvement was more common in ALH and MALToma.

Periorbital swelling and proptosis were the most common clinical symptoms in all patients (77.6% and 84.0%, respectively). Other symptoms, such as vision and motility impairments, pain, ptosis, and epiphora, were also frequently present. No ALH patients presented with motility impairment, which occurred in 23.26% of MALToma cases. No significant differences were observed in other clinical symptoms.

### IgD and CD23 expression in ocular adnexal LPDs

As the three types of ocular adnexal LPDs have different clinical features, we compared the pathological features of tumors from patients in the three groups. Hematoxylin–eosin staining revealed LF-like structures in the tissues of the three disease groups (Fig 1). Given that typical LFs contain IgD<sup>+</sup> follicular MZ and IgD<sup>-</sup>CD23<sup>+</sup> GC, we detected the LFs using IHC in a

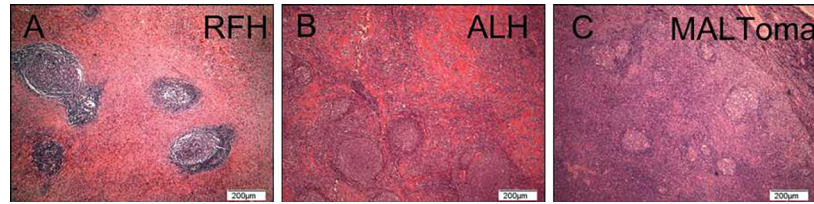

**Fig 1. Hematoxylin–eosin staining of RFH, ALH, and MALToma.** (A) RFH, (B) ALH, (C) MALToma. Various follicle-like structures accompanied by lymphocyte infiltration were observed in these three diseases by hematoxylin–eosin staining. Lymphocytes in the interfollicular areas showed no atypia.

<https://doi.org/10.1371/journal.pone.0160175.g001>

further analysis. First, we detected the expression of CD23 and IgD in tonsil specimens, because tonsil is a secondary lymphoid organ that contains normal LFs. The paracortical area of the tonsil specimens contained typical intact GCs and MZs, which were accompanied by variable numbers of plasma cells and histiocytes. The FDC network in GCs showed a strong immunoreactivity to the monoclonal antibody against CD23 and contained a half-moon-shaped IgD<sup>-</sup>CD23<sup>+</sup> net (Fig 2A). The MZ surrounding the GC appeared as an IgD<sup>+</sup> oval- or round-shaped circle comprised of small- to medium-sized lymphocytes with round or slightly indented nuclei (Fig 2B). We further assessed the presence of LFs in the RFH, ALH, and MALToma specimens. Variations in LF size and the frequencies of prominent CD23<sup>+</sup> GCs and

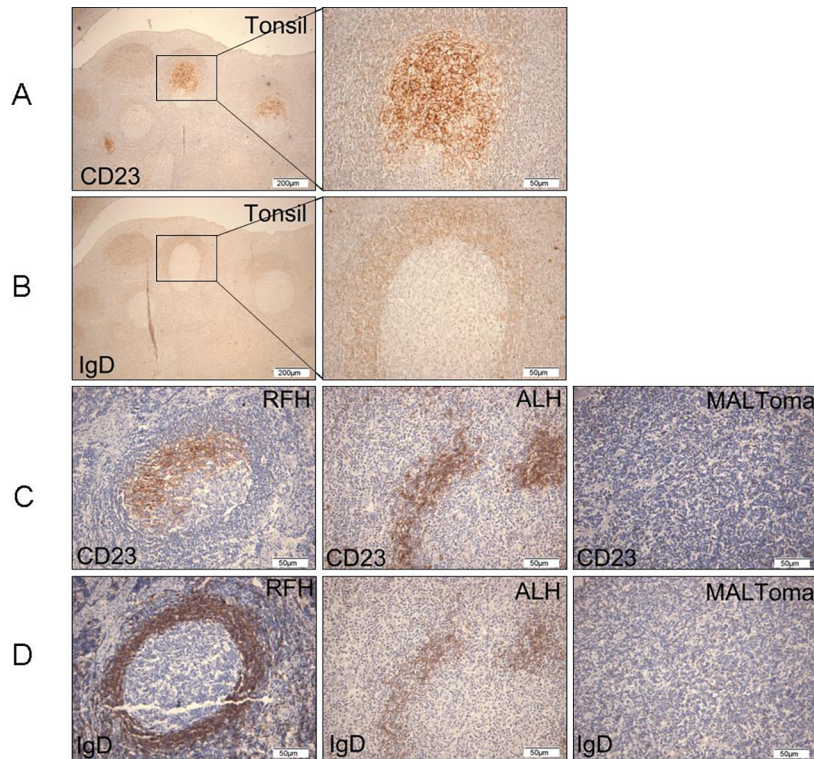

**Fig 2. Staining patterns of IgD and CD23 in tonsil, RFH, ALH, and MALToma tissues.** (A and B) Tonsil specimens showed typical secondary follicles containing an IgD<sup>-</sup>CD23<sup>+</sup> half-moon-shaped FDC network in the GC and a surrounding IgD<sup>+</sup> oval- to round-shaped mantle circle. The high-magnification composite figures show the immunoarchitectural pattern of a follicle nodule. (C and D) Follicles in RFH were characterized by prominent CD23<sup>+</sup> GCs and the preservation of IgD<sup>+</sup> MZs. The FDC meshwork and MZ fragments were irregularly shaped and scattered in ALH tumors. The FDC CD23<sup>+</sup> meshwork was broken into clusters. Few CD23<sup>+</sup> FDC meshwork fragments and IgD<sup>+</sup> B-cells were observed in MALToma.

<https://doi.org/10.1371/journal.pone.0160175.g002>

intact IgD<sup>+</sup> MZs were observed in tissues from RFH patients (Fig 2C and Fig 2D). Additionally, a CD23<sup>+</sup> half-moon-shaped FDC meshwork was apparent at the follicle light zone. Conversely, the ALH specimens showed scattered, residual reactive LFs and destroyed GCs. The FDC structure in ALH was dispersed. Most FDC networks in ALH specimens displayed irregularly shaped, disrupted, or fragmented clusters of FDC networks with scattered, disrupted IgD<sup>+</sup> MZ fragments (Fig 2C and Fig 2D). IHC of MALToma samples revealed the presence of very few LFs. Moreover, MALToma samples showed a prominent lack of both a CD23<sup>+</sup> FDC meshwork and IgD<sup>+</sup> mantle fragments, and few CD23<sup>+</sup> or IgD<sup>+</sup> lymphocytes were observed (Fig 2C and Fig 2D).

### Establishment of a combination scoring method for the diagnosis of LPDs

Based on the observed histomorphological differences described above, we first compared the expression of IgD and CD23 among the three types of LPDs. First, when considering all LPD cases, Pearson's correlation was significant between the IgD and CD23 positive rates (Pearson's  $r = 0.729$ ;  $P < 0.001$ ) (Fig 3A). In multiple comparisons, the rates of IgD and CD23 staining in RFH were significantly higher than those in the other two groups; however, there was

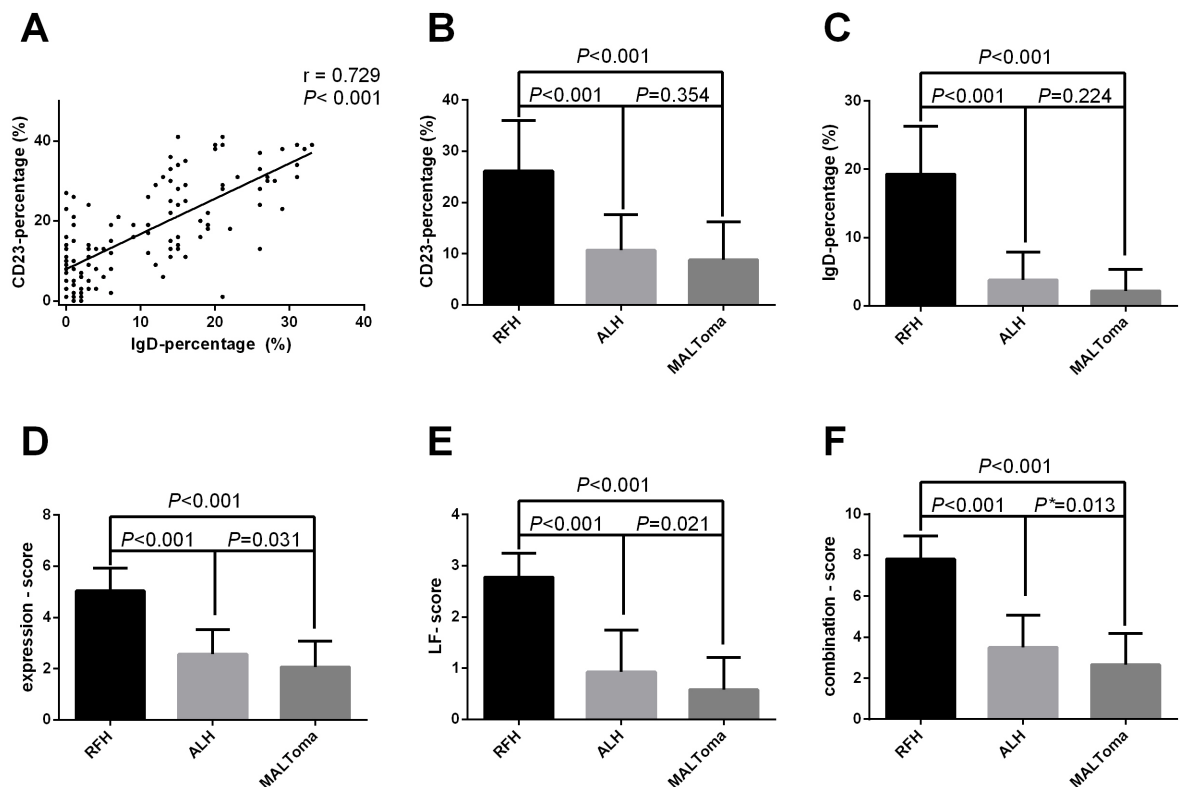

**Fig 3. IgD and CD23 expression in RFH, ALH, and MALToma.** (A) Pearson's correlation between the IgD and CD23 staining rates was significantly positive among the three types of ocular adnexal LPDs ( $r = 0.729$ ,  $P < 0.001$ ). (B) The means and standard deviations of the CD23 positivity rates were evaluated and were shown in bar charts. The parameter was not statistically different between ALH and MALToma. (C) The staining rate of IgD in RFH were much higher than those in ALH and MALToma ( $P < 0.01$ ), whereas these parameters were not significantly different between ALH and MALToma. (D) The expression score of RFH were significantly higher than those of ALH or MALToma, (E) Similar differences among the three groups were found for the comparison of LF structure. (F) The difference in the combination score was significant between ALH and MALToma ( $P < 0.05/3$ ). The asterisk (\*) indicates a significant difference.

<https://doi.org/10.1371/journal.pone.0160175.g003>

no difference between ALH and MALToma in this respect (Fig 3B and Fig 3C). Then, based on the integrity of the LF structure and the expression levels of CD23/IgD, we individually established two scoring methods (LF score and expression score) for all samples according to the criteria shown in Tables 1 and 2. We found that both the expression score and LF score of RFH were significantly higher than those of ALH or MALToma, whereas no significant differences in IHC staining were observed between ALH and MALToma (Fig 3D and Fig 3E). Given that the integrity of the LF was confirmed by the IgD<sup>+</sup>/CD23<sup>+</sup> expression profile of the cells and the structure of the LF, we combined the expression score and the LF score to establish a scoring method for LFs (combination score). The three types of LPDs were found to be effectively diagnosed using the combination score ( $P < 0.05 / 3$ ) (Fig 3F).

In a further investigation, we analyzed the association between the combination score and the different clinical features described above. The combination score was negatively related with patient age (Pearson's  $r = -0.305$ ;  $P = 0.001$ ) (Fig 4A). Additionally, we found that the combination score was higher in female patients than in male patients (Fig 4B). Furthermore, patients with bilateral involvement had a higher combination score than those with unilateral involvement (Fig 4C).

### IgH gene clonal rearrangement analysis

According to the BIOMED-2 protocol, we further detected IgH gene clonal rearrangements in 73 cases, including 35 RFH, 17 ALH, and 21 MALToma. Because some paraffin embedded samples had been stored for a long period, 52 of the DNA templates from the 125 cases were found to have become severely degraded by a quality control gene primer set test (S1 Fig). Therefore, the PCR amplification could not be carried out for these 52 cases. Monoclonal IgH gene rearrangements were detected in 18/21 MALToma specimens and 8 ALH specimens, but 9 ALH cases and all RFH lesions were negative for clonal rearrangements (S2 Fig). Based on a comparison with the results of this IgH gene clonal rearrangement analysis, the sensitivity of our combination scoring method was 85.7% (18/21) for MALToma samples and 35.3% (6/17) for ALH cases.

### Discussion

The differential diagnosis of the three types of LPDs poses a difficult clinical problem. In our study, we analyzed the clinical features of orbital LPDs and evaluated IgD/CD23 expression by

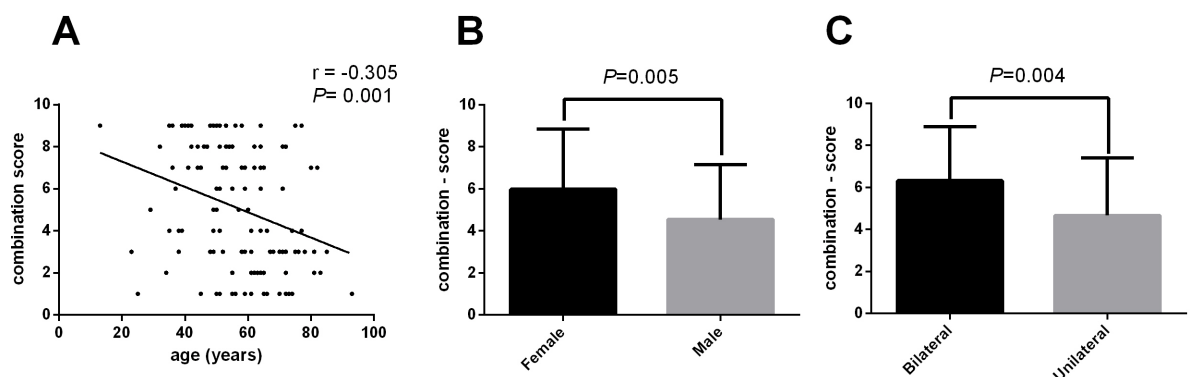

**Fig 4. Combination score in LPDs and the correlation with clinical features.** (A) The combination score decreased as the patient age increased, with a significantly negative correlation ( $r = -0.305$ ;  $P = 0.001$ ). (B) In all 125 cases with LPDs, the combination score of females was obviously higher than that of males ( $P = 0.005$ ). (C) The combination score in patients with bilateral involvement was significantly higher than that in patients with unilateral involvement ( $P = 0.004$ ).

<https://doi.org/10.1371/journal.pone.0160175.g004>



IHC in a large sample. We further established a combination scoring method for the differential diagnosis of orbital LPDs.

Ocular adnexal LPDs are traditionally thought to be either benign reactive hyperplasias or malignant lymphomas. Because not all lymphoid lesions can be classified as benign or malignant, ALH is often described as the boundary between these two phenotypes. MALToma is the most frequent orbital malignancy in senior adults, with an increasing incidence according to several recent reports [2,4,28,29]. In the differential diagnosis of LPDs, it is often difficult to reach a definite diagnosis because of similarities in the clinical and histological features among ocular adnexal RFH, ALH, and MALToma, and especially between ALH and MALToma.

To our knowledge, this is the first report in which the clinical features of RFH, ALH, and MALToma of the ocular adnexa have been distinguished in such a large sample. MALToma patients are generally older [9,15], whereas RFH patients are often young or middle-aged. This suggests that younger individuals have a better controlled immune reaction to foreign antigens, which may help to prevent malignant transformation. Moreover, female patients comprise a major fraction of RFH cases, but only a small fraction of MALToma cases. This difference might be associated with differences in the immune system or hormonal variations between males and females, which would be an interesting topic for future studies. LPDs often involve two or more tissues of the ocular adnexa. In our study, RFH was more likely to be present in the bilateral orbit, especially in both lachrymal glands [16], whereas MALToma tended to be localized within the conjunctiva. A high incidence of conjunctival disease in MALToma cases was reported in a number of earlier studies [5,15,30–32]. The reduced lachrymal gland involvement in MALToma may be related to a reduced function of lachrymal glands in the elderly population. The pathophysiological basis for the increased involvement of the conjunctiva in MALToma is also unclear and should be addressed in future studies.

Diseases of particular ocular adnexal tissues often correspond to characteristic clinical presentations; however, because LPDs are relatively painless in the majority of cases, patients usually wait for a long time before seeking medical treatment. Because most elderly people are unable to identify small and painless alterations in their bodies, a yearly health examination is necessary to prevent high-grade transformations of MALToma.

In our clinical study, the differences in clinical features and progression were not obvious enough to distinguish the three disease types. Recently, several studies have suggested or provided supporting evidence for the concept that aberrant leukomonocyte proliferation may be subclinical until additional genetic changes cause the process to become irreversible [10, 33–38].

The ocular adnexa contains several mucosal surfaces of lymphoid tissue, such as the orbit, conjunctiva, lacrimal glands, and eyelids [4,15,39]. These regions are rich in antigenic stimuli, including infectious agents derived from the external environment; thus, the ocular region serves as a first line of defense against harmful antigens that enter the body and plays a crucial role in immunity. Consequently, it is common to find swollen conjunctiva, enlarged lacrimal glands, and/or orbital masses in these patients in the clinic. Orbital MALToma has typically been described in reactive and inflammatory conditions [40]. The treatment and prevention strategies for the majority of early MALTomas are not different from those for RFH (surgical excision and observation, respectively). Antibiotic therapy is often effective at shrinking the ocular lesion, which further suggests a potential relationship between the immune response to microbial pathogens and the genetic abnormalities leading to malignant transformation. From an etiological standpoint, it has been reported that some patients with ocular lesions have had one or more infectious diseases, although a definite causative relationship remains unclear [41]. The pathogens that may be relevant have been identified as *Chlamydia psittaci*, toxoplasma, Epstein–Barr virus, syphilis, human immunodeficiency virus, and hepatitis C [42–47].

The possible association between orbital LPDs and infectious agents is still heavily debated. The best example of an infection-associated LPD is *Helicobacter pylori* infection associated with gastritis and gastric MALToma [48–50], where chronic antigenic stimulation causes immunological responses and inflammation. However, not all lymphoproliferative conditions transition into malignant lesions, suggesting that this is a complex process dependent on various factors, including the patient's age, immune system response, exposure duration, and stimulus length.

LFs are crucial for the generation of humoral immunity [17,18]. However, although LFs provide B-cells for intact antibody-dependent responses, they are associated with a risk of generating autoreactive B-cells and B-cell lymphomas. Various lymphomas have been hypothesized to arise from these cells based on their differentiation stages within the LFs [51]. For instance, hyperplasia of mature B-cells that localize to the marginal and interfollicular zones likely results in MALToma through mutations incurred by immunoglobulin class-switch recombination [52,53]. This mechanism could explain the low-grade feature of MALToma. Conversely, GC B-cells within the FDC network are characterized by a high rate of proliferation, whereas GC cell hyperplasia is restricted by the FDC network [54,55]. Because most naïve mature B-cells in the MZ express IgD, and given that FDC networks have typical CD23 expression patterns, the combined use of IgD and CD23 immunostaining can clearly reveal the LF structure.

In our IHC study, our combination scoring system was useful to assess the alterations in the amorphous LF structure to better distinguish among RFH, ALH, and MALToma. In RFH, the profiles of CD23<sup>+</sup> GCs and IgD<sup>+</sup> MZs were distinct and easily recognizable. In ALH, the number and shape of the LFs were respectively decreased and varied, with irregularities in the size and presence of IgD<sup>+</sup> mantle circles and CD23<sup>+</sup> FDC networks. LFs were also found in MALToma, but with a significantly reduced incidence. In addition, only scattered and small residual CD23<sup>+</sup> FDC networks and lamellar IgD<sup>+</sup> cell clusters were observed in MALToma. This intriguing phenomenon of changes in the characteristics of LFs among the three groups also suggests that the LF structure becomes gradually disrupted as the disease state progresses. The results of this retrospective study are consistent with those of some previous studies [5,30,56].

IgH gene rearrangement analysis is sensitive and helpful for evaluating some patients for whom it is difficult to make a final diagnosis, especially regarding the stage of ALH. Some studies have shown that novel IgH gene rearrangements of several ALH cases could be detected in further follow-up biopsies [20,57]. The combined detection of three gene rearrangements (IgH-FR1, -FR2, and -FR3) is helpful for making a final diagnosis. However, the analysis of complex IgH gene rearrangements is expensive and difficult to apply in some primary hospitals. Our scoring method, which is based on morphological evidence, might be easier to perform and may assist with the diagnosis of MALToma as well as the differential diagnosis of LPDs. In summary, from an analysis of 125 LPD cases, we found that IHC staining for IgD and CD23 is a useful tool for distinguishing among RFH, ALH, and MALToma. The diagnostic scoring method that we designed could be used to classify most ocular adnexal B-cell clonal proliferative diseases. Ultimately, a combination of clinical features and histologic evaluation will provide the best opportunity to correctly diagnose LPDs and determine an appropriate treatment strategy. Nevertheless, additional studies are necessary to verify our findings and conclusively determine the pathogenetic relationship among the various B-cell LPD subtypes.

## Supporting information

**S1 Fig. Quality control of DNA samples.** Lane 6: DNA marker; Lanes 5, 8, 9, 11–14, and 18: clear 200, 300, 400, and 600 bp PCR product bands, indicating that the template DNA was extracted successfully; Lanes 1–4, 7, 10, and 15–17: no specific bands or thin bands, indicating

that the amount and/or quality of the extracted DNA was insufficient for analysis.  
(JPG)

**S2 Fig. Polyacrylamide gel electrophoresis to detect IgH gene rearrangements in ocular adnexal LPDs.** (A) IgH-tube A. Lane 1: DNA marker, Lane 2: positive control, Lane 3: negative control, Lane 4: blank control. Lanes 5–6 show amplified bands between 310–360 bp, indicating a positive IgH-tube A gene rearrangement. Lanes 7 and 8 show no clonal rearrangement. (B) IgH-tube B. Lane 1: DNA marker, Lane 9: positive control, Lane 10: negative control, Lane 11: blank control. Lanes 12–14 show amplified bands between 250–295 bp, indicating a positive IgH-tube B gene rearrangement. Lane 15 shows no clonal rearrangement. Lane 16 shows smear bands, indicating a polyclonal rearrangement. (C) IgH-tube C. Lane 1: DNA marker, Lane 17: positive control, Lane 18: negative control, Lane 19: blank control. Lanes 20–21 show amplified bands between 100–170 bp, indicating a positive IgH-tube C gene rearrangement. Lanes 22–24 show no clonal rearrangement.  
(TIF)

**S1 File. File contains full data for each subject included in the study.**  
(XLSX)

## Author Contributions

**Conceptualization:** GY LHX.

**Data curation:** XLQ GY LHX.

**Formal analysis:** GY LHX.

**Funding acquisition:** LHX.

**Investigation:** XLQ LK GY LHX.

**Methodology:** LK GY.

**Project administration:** GY LHX.

**Resources:** YH LK GY LHX XJY YW XZL.

**Software:** LK YH GY LHX.

**Supervision:** GY LHX.

**Validation:** YH LK GY.

**Visualization:** XLQ GY LHX.

**Writing – original draft:** XLQ.

**Writing – review & editing:** GY LHX.

## References

1. Van der Gaag R, Koornneef L, van Heerde P, Vroom TM, Pegels JH, Feltkamp CA, et al. Lymphoid proliferations in the orbit: malignant or benign? *The British Journal of Ophthalmology*. 1984; 68(12):892–900 PMID: [6391535](https://pubmed.ncbi.nlm.nih.gov/6391535/)
2. Ting DS, Perez-Lopez M, Chew NJ, Clarke L, Dickinson AJ, Neoh C. A 10-year review of orbital biopsy: the Newcastle Eye Centre Study. *Eye (Lond)*. 2015 Jun 5. [Epub ahead of print]
3. Isaacson PG. Lymphomas of mucosa-associated lymphoid tissue (MALT). *Histopathology*. 1990; 16(6):617–9. PMID: [2376404](https://pubmed.ncbi.nlm.nih.gov/2376404/)

4. Oh DE, Kim YD. Lymphoproliferative diseases of the ocular adnexa in Korea. *Arch Ophthalmol*. 2007; 125(12):1668–73. <https://doi.org/10.1001/archophth.125.12.1668> PMID: 18071120
5. Fukuhara J., Kase S., Noda M., Ishijima K., Yamamoto T., & Ishida S. Conjunctival lymphoma arising from reactive lymphoid hyperplasia. *World Journal of Surgical Oncology*, 2012. 10, 194. <https://doi.org/10.1186/1477-7819-10-194> PMID: 22985187
6. Garner A. Orbital lymphoproliferative disorders. *The British Journal of Ophthalmology*, 1992; 76(1), 47–48. PMID: 1739692
7. Schroer KR, Franssila KO. Atypical hyperplasia of lymph nodes: a follow-up study. *Cancer*. 1979; 44(3):1155–63. PMID: 582574
8. Hussein MR. Atypical lymphoid proliferations: the pathologist's viewpoint. *Expert Rev Hematol*. 2013; 6(2):139–53. <https://doi.org/10.1586/ehm.13.4> PMID: 23547864
9. Isaacson P, Wright DH. Extranodal malignant lymphoma arising from mucosa-associated lymphoid tissue. *Cancer*. 1984; 53(11):2515–24. PMID: 6424928
10. Hoshida Y, Tomita Y, Zhiming D, Yamauchi A, Nakatsuka S, Kurasono Y, et al. Lymphoproliferative disorders in autoimmune diseases in Japan: analysis of clinicopathological features and Epstein-Barr virus infection. *Int J Cancer*. 2004; 108(3):443–9. <https://doi.org/10.1002/ijc.11582> PMID: 14648712
11. Garner A., Rahi A. H., & Wright J. E. Lymphoproliferative disorders of the orbit: an immunological approach to diagnosis and pathogenesis. *The British Journal of Ophthalmology*, 1983; 67(9), 561–569. PMID: 6603866
12. Isaacson PG. Update on MALT lymphomas. *Best Pract Res Clin Haematol*. 2005 Mar; 18(1):57–68. Review. <https://doi.org/10.1016/j.beha.2004.08.003> PMID: 15694184
13. Isaacson PG, Du MQ. Gastric lymphomas: genetics and resistance to *H. pylori* eradication. *Verh Dtsch Ges Pathol*. 2003; 87:116–22. Review. PMID: 16888902
14. Piccaluga PP, Agostinelli C, Gazzola A, et al. Pathobiology of Hodgkin lymphoma. *Adv Hematol* 2011 [2011:920898. Epub 2010 Dec 22].
15. Ponzoni M., Govi S., Licata G., Mappa S., Giordano Resti A., Politi L. et al. A Reappraisal of the Diagnostic and Therapeutic Management of Uncommon Histologies of Primary Ocular Adnexal Lymphoma. *The Oncologist*, 2013; 18(7), 876–884. <https://doi.org/10.1634/theoncologist.2012-0425> PMID: 23814042
16. Mannami T, Yoshino T, Oshima K, Takase S, Kondo E, Ohara N, et al. Clinical, histopathological, and immunogenetic analysis of ocular adnexal lymphoproliferative disorders: characterization of malt lymphoma and reactive lymphoid hyperplasia. *Mod Pathol*. 2001; 14(7):641–9. <https://doi.org/10.1038/modpathol.3880366> PMID: 11454995
17. De Silva NS, Klein U. Dynamics of B cells in germinal centres. *Nat Rev Immunol*. 2015; Mar; 15(3):137–48. Epub 2015 Feb 6. Review. PubMed Central PMCID: PMC4399774. <https://doi.org/10.1038/nri3804> PMID: 25656706
18. Hamel KM, Liarski VM, Clark MR. Germinal center B-cells. *Autoimmunity*. 2012; 45(5):333–47. Epub 2012 Apr 2. Review. <https://doi.org/10.3109/08916934.2012.665524> PMID: 22390182
19. Klein U, Dalla-Favera R. Germinal centres: role in B-cell physiology and malignancy. *Nat Rev Immunol*. 2008; 8(1):22–33. Review. <https://doi.org/10.1038/nri2217> PMID: 18097447
20. van Dongen JJ, Langerak AW, Brüggemann M, Evans PA, Hummel M, Lavender FL, Delabesse E, Davi F, Schuurin E, García-Sanz R, van Krieken JH, Droese J, González D, Bastard C, White HE, Spaargaren M, González M, Parreira A, Smith JL, Morgan GJ, Kneba M, Macintyre EA. Design and standardization of PCR primers and protocols for detection of clonal immunoglobulin and T-cell receptor gene recombinations in suspect lymphoproliferations: report of the BIOMED-2 Concerted Action BMH4-CT98-3936. *Leukemia*. 2003 Dec; 17(12):2257–317. Review. <https://doi.org/10.1038/sj.leu.2403202> PMID: 14671650
21. Gatto D, Brink R. The germinal center reaction. *J Allergy Clin Immunol*. 2010; 126(5):898–907; quiz 908–9. Review. <https://doi.org/10.1016/j.jaci.2010.09.007> PMID: 21050940
22. Maeda K, Matsuda M, Suzuki H, Saitoh HA. Immunohistochemical recognition of human follicular dendritic cells (FDCs) in routinely processed paraffin sections. *J Histochem Cytochem*. 2002; 50(11):1475–86. <https://doi.org/10.1177/002215540205001107> PMID: 12417613
23. Allen CD, Cyster JG. Follicular dendritic cell networks of primary follicles and germinal centers: phenotype and function. *Seminars in immunology*. 2008 Feb; 20(1):14–25. Epub 2008 Feb 7. Review. PubMed Central PMCID: PMC2366796. <https://doi.org/10.1016/j.smim.2007.12.001> PMID: 18261920
24. Shi YF, Li XH. Immunohistochemical patterns of follicular dendritic cell meshwork and Ki-67 in small B-cell lymphomas. *Zhonghua Bing Li Xue Za Zhi*. 2013; 42(4):222–6. Chinese. <https://doi.org/10.3760/cma.j.issn.0529-5807.2013.04.003> PMID: 23928527

25. Murray PG, Janmohamed RM, Crocker J. CD23 expression in non-Hodgkin lymphoma: immunohistochemical demonstration using the antibody BU38 on paraffin sections. *J Pathol*. 1991; 165(2):125–8. <https://doi.org/10.1002/path.1711650207> PMID: 1744798
26. Nguyen DT, Diamond LW, Hansmann ML, Alavaikko MJ, Schröder H, Fellbaum C, Fischer R. Castleman's disease. Differences in follicular dendritic network in the hyaline vascular and plasma cell variants. *Histopathology*. 1994 May; 24(5):437–43. PMID: 8088715
27. Langerak AW, Szczepański T, van der Burg M, Wolvers-Tettero IL, van Dongen JJ. Heteroduplex PCR analysis of rearranged T cell receptor genes for clonality assessment in suspect T cell proliferations. *Leukemia*. 1997 Dec; 11(12):2192–9. PMID: 9447840
28. Demirci H, Shields C, Shields J, Honavar SG, Mercado GJ, Tovilla JC. Orbital tumors in the older adult population. *Ophthalmology*. 2002; 109:243–248. PMID: 11825802
29. Li EY, Yuen HK, Cheuk W. Lymphoproliferative Disease of the Orbit. *Asia Pac J Ophthalmol (Phila)*. 2015; 4(2):106–11.
30. Cahill M., Barnes C., Moriarty P., Daly P., & Kennedy S. Ocular adnexal lymphoma—comparison of MALT lymphoma with other histological types. *The British Journal of Ophthalmology*, 1999; 83(6), 742–747. PMID: 10340987
31. Knowles DM, Jakobiec FA, McNally L, et al. Lymphoid hyperplasia and malignant lymphoma occurring in the ocular adnexa (orbit, conjunctiva and eyelids): a prospective multiparametric analysis of 108 cases during 1977 to 1987. *Hum Pathol* 1990; 21:959–73. PMID: 2394438
32. Medicos LJ, Harris NL. Lymphoid infiltrates of the orbit and conjunctiva: a morphologic and immunophenotypic study of 99 cases. *Am J Surg Pathol* 1989; 13:459–71. PMID: 2658631
33. Wilson JB, Levine AJ. The oncogenic potential of Epstein–Barr virus nuclear antigen 1 in transgenic mice. *Curr Top Microbiol Immunol*; 1992; 182: 375–384. PMID: 1337032
34. Zucca E, Bertoni F, Roggero E, Bosshard G, Cazzaniga G, Pedrinis E, Biondi A, Cavalli F. Molecular analysis of the progression from *Helicobacter pylori*-associated chronic gastritis to mucosa-associated lymphoid-tissue lymphoma of the stomach. *N Engl J Med*; 1998; 338(12):804–10. <https://doi.org/10.1056/NEJM199803193381205> PMID: 9504941
35. Aljurf MD, Owaidah TW, Ezzat A, Ibrahim E, Tbakhi A. Antigen- and/or immune-driven lymphoproliferative disorders. *Ann Oncol*. 2003; 14(11):1595–606. Review. PMID: 14581266
36. Good DJ, Gascoyne RD. Atypical lymphoid hyperplasia mimicking lymphoma. *Hematol Oncol Clin North Am*. 2009; 23(4):729–45. Review. <https://doi.org/10.1016/j.hoc.2009.04.005> PMID: 19577167
37. O'Malley DP, Grimm KE. Reactive lymphadenopathies that mimic lymphoma: entities of unknown etiology. *Semin Diagn Pathol*. 2013; 30(2):137–45. Epub 2013 Mar 26. Review. <https://doi.org/10.1053/j.semdp.2012.08.007> PMID: 23537913
38. Lee JL, Kim MK, Lee KH, Hyun MS, Chung HS, Kim DS, et al. Extranodal marginal zone B-cell lymphomas of mucosa-associated lymphoid tissue-type of the orbit and ocular adnexa. *Ann Hematol*. 2005; 84(1):13–8. Epub 2004 Aug 10. <https://doi.org/10.1007/s00277-004-0914-3> PMID: 15309523
39. Stefanovic A., & Lossos I. S. Extranodal marginal zone lymphoma of the ocular adnexa. *Blood*, 2009; 114(3), 501–510. <https://doi.org/10.1182/blood-2008-12-195453> PMID: 19372259
40. Neri A, Jakobiec FA, Pelicci PG, Dalla-Favera R, Knowles DM 2nd. Immunoglobulin and T cell receptor beta chain gene rearrangement analysis of ocular adnexal lymphoid neoplasms: clinical and biologic implications. *Blood*. 1987; 70(5):1519–29. PMID: 3663945
41. Collina F., De Chiara A., De Renzo A., De Rosa G., Botti G., & Franco R. Chlamydia psittaci in ocular adnexa MALT lymphoma: a possible role in lymphomagenesis and a different geographical distribution. *Infectious Agents and Cancer*, 2012; 7, 8. <https://doi.org/10.1186/1750-9378-7-8> PMID: 22472082
42. Verma V., Shen D., Sieving P. C., & Chan C.-C. The Role of Infectious Agents in the Etiology of Ocular Adnexal Neoplasia. *Survey of Ophthalmology*, 2008; 53(4), 312–331. <https://doi.org/10.1016/j.survophthal.2008.04.008> PMID: 18572051
43. Cai J.-P., Cheng J.-W., Ma X.-Y., Li Y.-Z., Li Y., Huang X., et al. Lack of association of conjunctival MALT lymphoma with Chlamydiae or *Helicobacter pylori* in a cohort of Chinese patients. *Medical Science Monitor: International Medical Journal of Experimental and Clinical Research*, 2012; 18(2), BR84–BR88.
44. Al-Mujaini A., Wali U., Ganesh A., Al-Hadabi I., & Burney I. Ocular Adnexal Reactive Lymphoid Hyperplasia in Children. *Middle East African Journal of Ophthalmology*, 2012; 19(4), 406–409. <https://doi.org/10.4103/0974-9233.102760> PMID: 23248544
45. Bilal JA, Alsammani MA, Ahmed MI. Acute *Toxoplasma gondii* infection in children with reactive hyperplasia of the cervical lymph nodes. *Saudi Med J*. 2014 Jul; 35(7):699–703. PMID: 25028226
46. Herwig MC, Fassunke J, Merkelbach-Bruse S, Holz FG, Fischer HP, Loeffler KU. Reactive lymphoid hyperplasia of the ocular surface: clinicopathologic features and search for infectious agents. *Acta*

- Ophthalmol. 2012 Jun; 90(4):e331–2. Epub 2011 Nov 8. <https://doi.org/10.1111/j.1755-3768.2011.02285.x> PMID: 22067517
47. Kojima M, Nakamura S, Shimizu K, Iijima M, Murayama K, Ohno Y, Itoh H, Sakata N, Masawa N. Reactive lymphoid hyperplasia of the lymph nodes with giant follicles: a clinicopathologic study of 14 Japanese cases, with special reference to Epstein-Barr virus infection. *Int J Surg Pathol*. 2005 Jul; 13(3):267–72. <https://doi.org/10.1177/106689690501300306> PMID: 16086082
  48. Witkowska M, Smolewski P. Helicobacter pylori infection, chronic inflammation, and genomic transformations in gastric MALT lymphoma. *Mediators Inflamm*. 2013; 2013:523170. Epub 2013 Mar 28. Review. PubMed Central PMCID: PMC3625579. <https://doi.org/10.1155/2013/523170> PMID: 23606792
  49. Pereira M.-I., & Medeiros J. A. Role of Helicobacter pylori in gastric mucosa-associated lymphoid tissue lymphomas. *World Journal of Gastroenterology: WJG*, 2014; 20(3), 684–698. <https://doi.org/10.3748/wjg.v20.i3.684> PMID: 24574742
  50. Dong B., Xie Y.-Q., Chen K., Wang T., Tang W., You W.-C., et al. Differences in biological features of gastric dysplasia, indefinite dysplasia, reactive hyperplasia and discriminant analysis of these lesions. *World Journal of Gastroenterology: WJG*, 2005; 11(23), 3595–3600. <https://doi.org/10.3748/wjg.v11.i23.3595> PMID: 15962383
  51. Coupland SE. The challenge of the microenvironment in B-cell lymphomas. *Histopathology*. 2011; 58(1):69–80. Review. <https://doi.org/10.1111/j.1365-2559.2010.03706.x> PMID: 21261684
  52. Klein U, Dalla-Favera R. Germinal centres: role in B-cell physiology and malignancy. *Nat Rev Immunol*. 2008 Jan; 8(1):22–33. Review. <https://doi.org/10.1038/nri2217> PMID: 18097447
  53. Zotos D, Tarlinton DM. Determining germinal centre B cell fate. *Trends Immunol*. 2012; 33(6):281–8. Epub 2012 May 16. Review. <https://doi.org/10.1016/j.it.2012.04.003> PMID: 22595532
  54. Kasajima-Akatsuka N, Maeda K. Development, maturation and subsequent activation of follicular dendritic cells (FDC): immunohistochemical observation of human fetal and adult lymph nodes. *Histochem Cell Biol*. 2006 Aug; 126(2):261–73. Epub 2006 Feb 10. <https://doi.org/10.1007/s00418-006-0157-6> PMID: 16470387
  55. Fujihara M. Study of CD21-positive FDC-like structures in MALT lymphoma: Does it provide helpful information for histopathological diagnosis? *Pathol Int*. 2010; 60(9):642–3. <https://doi.org/10.1111/j.1440-1827.2010.02574.x> PMID: 20712652
  56. Jin MK, Hoster E, Dreyling M, Unterhalt M, Hiddemann W, Klapper W. Follicular dendritic cells in follicular lymphoma and types of non-Hodgkin lymphoma show reduced expression of CD23, CD35 and CD54 but no association with clinical outcome. *Histopathology*. 2011; 58(4):586–92. Epub 2011 Mar 14. <https://doi.org/10.1111/j.1365-2559.2011.03779.x> PMID: 21401698
  57. Wang Q, Li XQ, Zhu XZ, Zhu XL, Lu HF, Zhang TM, Zhou XY. Immunoglobulin heavy chain gene rearrangement study in difficult cases of B-cell lymphoproliferative disorder. *Zhonghua Bing Li Xue Za Zhi*. 2010 May; 39(5):296–301. Chinese. PMID: 20654151
